# Supplementary material for: Body Mass Index and Cancer Mortality Among Korean Older Middle-Aged Men: A Prospective Cohort Study
Source: PubMed Central journal article supplement (PMC4902352; doi:10.1097/md.0000000000003684), 2016-05-27
Supplement: medi-95-e3684-s001.pdf [file medi-95-e3684-s001.pdf]

**eTable 1. Cancer mortality outcomes, their ICD-10 codes, and characteristics related to exclusion of prevalent diseases at baseline (and two years of follow-up)**

| Cancer site                      | ICD-10           | No. Deaths in all participants (n=113,478) (PY=705,175) | No. Deaths in participants with no pre-existing cancer (n=110,013) (PY=686,845) | No. Deaths in participants with no pre-existing cancer after exclusion of the first two years of follow-up (n=108,447) (PY=685,119) | Variables additionally adjusted for in the Cox model         |
|----------------------------------|------------------|---------------------------------------------------------|---------------------------------------------------------------------------------|-------------------------------------------------------------------------------------------------------------------------------------|--------------------------------------------------------------|
| All cancer                       | C00-D48          | 3478                                                    | 2625                                                                            | 2164                                                                                                                                |                                                              |
| Upper aerodigestive tract (UADT) | C00-C15, C30-C32 | 207                                                     | 167                                                                             | 139                                                                                                                                 |                                                              |
| Non-UADT-non-lung                | C16-C26, C37-C97 | 2431                                                    | 1782                                                                            | 1462                                                                                                                                |                                                              |
| Oral cavity and larynx           | C00-C14          | 56                                                      | 38                                                                              | 32                                                                                                                                  |                                                              |
| Esophagus                        | C15              | 112                                                     | 101                                                                             | 85                                                                                                                                  |                                                              |
| Stomach                          | C16              | 468                                                     | 341                                                                             | 290                                                                                                                                 |                                                              |
| Large intestine                  | C18-C21          | 313                                                     | 206                                                                             | 191                                                                                                                                 |                                                              |
| Liver                            | C22              | 824                                                     | 609                                                                             | 469                                                                                                                                 | Viral hepatitis (B15-B19) and liver diseases                 |
| Gall bladder                     | C23-C24          | 129                                                     | 104                                                                             | 78                                                                                                                                  |                                                              |
| Pancreas                         | C25              | 174                                                     | 149                                                                             | 114                                                                                                                                 |                                                              |
| Lung                             | C33-C34          | 806                                                     | 648                                                                             | 543                                                                                                                                 | Respiratory related diseases (COPD, pneumonia, tuberculosis) |
| Prostate                         | C61              | 46                                                      | 23                                                                              | 22                                                                                                                                  |                                                              |
| Kidney                           | C64-C66          | 60                                                      | 38                                                                              | 32                                                                                                                                  |                                                              |
| Bladder                          | C67              | 49                                                      | 31                                                                              | 24                                                                                                                                  |                                                              |
| Non-Hodgkin lymphoma (NHL)       | C82-C85          | 74                                                      | 59                                                                              | 49                                                                                                                                  |                                                              |
| Leukemia                         | C91-C95          | 59                                                      | 51                                                                              | 43                                                                                                                                  |                                                              |

BMI, body mass index; COPD, chronic obstructive pulmonary diseases; CVD, cerebrovascular diseases; HR, hazard ratio; ICD-10, International Classification of Diseases 10<sup>th</sup> Revision; IHD, ischemic heart disease; NHL, non-Hodgkin lymphoma; PY=person-year; SD, standard deviation; UADT, upper aero-digestive tract

**eTable 2. Hazard ratios for cancer mortality associated with BMI across BMI groups in participants with no pre-existing cancers at baseline.**

| Cancer site            | All participants (12-47 kg/m <sup>2</sup> ) |         |                 |              | 12-24.9 kg/m <sup>2</sup>         |         |                 |               | 25-47 kg/m <sup>2</sup>            |         |                 |               |
|------------------------|---------------------------------------------|---------|-----------------|--------------|-----------------------------------|---------|-----------------|---------------|------------------------------------|---------|-----------------|---------------|
|                        | per 5 kg/m <sup>2</sup> higher BMI          |         |                 |              | per 5 kg/m <sup>2</sup> lower BMI |         |                 |               | per 5 kg/m <sup>2</sup> higher BMI |         |                 |               |
|                        | Deaths                                      | p-value | HR <sup>b</sup> | (95% CI)     | Deaths                            | p-value | HR <sup>b</sup> | (95% CI)      | Deaths                             | p-value | HR <sup>b</sup> | (95% CI)      |
| All cancer             | 2625                                        | <0.001  | 0.85            | (0.79, 0.91) | 1955                              | <0.001  | 1.37            | (1.22, 1.54)  | 670                                | 0.039   | 1.27            | (1.01, 1.61)  |
| UADT                   | 167                                         | <0.001  | 0.42            | (0.31, 0.57) | 140                               | <0.001  | 2.95            | (1.98, 4.39)  | 27                                 | 0.998   | 1.00            | (0.29, 3.45)  |
| Non-UADT, non-lung     | 1782                                        | 0.722   | 0.98            | (0.9, 1.08)  | 1280                              | 0.163   | 1.11            | (0.96, 1.29)  | 502                                | 0.064   | 1.29            | (0.99, 1.68)  |
| Oral cavity and larynx | 38                                          | 0.012   | 0.45            | (0.24, 0.84) | 29                                | <0.001  | 4.99            | (2.18, 11.42) | 9                                  | 0.434   | 2.02            | (0.35, 11.73) |
| Esophagus              | 101                                         | <0.001  | 0.45            | (0.31, 0.67) | 84                                | 0.001   | 2.53            | (1.5, 4.27)   | 17                                 | 0.511   | 0.55            | (0.09, 3.31)  |
| Stomach                | 341                                         | 0.341   | 0.91            | (0.74, 1.11) | 245                               | 0.076   | 1.35            | (0.97, 1.88)  | 96                                 | 0.913   | 1.04            | (0.54, 1.97)  |
| Large intestine        | 206                                         | 0.624   | 1.07            | (0.82, 1.39) | 136                               | 0.152   | 1.38            | (0.89, 2.15)  | 70                                 | 0.650   | 1.19            | (0.56, 2.52)  |
| Liver                  | 609                                         | 0.276   | 0.92            | (0.79, 1.07) | 452                               | 0.813   | 1.03            | (0.8, 1.33)   | 157                                | 0.050   | 1.56            | (1, 2.44)     |
| Gall bladder           | 104                                         | 0.822   | 1.04            | (0.72, 1.5)  | 72                                | 0.314   | 1.36            | (0.75, 2.49)  | 32                                 | 0.218   | 1.80            | (0.71, 4.6)   |
| Pancreas               | 149                                         | 0.231   | 0.82            | (0.6, 1.13)  | 114                               | 0.703   | 1.10            | (0.66, 1.83)  | 35                                 | 0.725   | 0.81            | (0.26, 2.55)  |
| Lung                   | 648                                         | <0.001  | 0.67            | (0.58, 0.78) | 517                               | <0.001  | 1.74            | (1.4, 2.16)   | 131                                | 0.221   | 1.37            | (0.83, 2.28)  |
| Prostate               | 23                                          | 0.811   | 0.90            | (0.4, 2.06)  | 14                                | 0.103   | 3.02            | (0.8, 11.41)  | 9                                  | 0.820   | 0.76            | (0.07, 8.32)  |
| Kidney                 | 38                                          | 0.431   | 0.78            | (0.42, 1.45) | 28                                | 0.784   | 1.15            | (0.42, 3.14)  | 10                                 | 0.240   | 0.17            | (0.01, 3.29)  |
| Bladder                | 31                                          | 0.850   | 0.94            | (0.48, 1.84) | 21                                | 0.291   | 1.80            | (0.61, 5.33)  | 10                                 | 0.795   | 0.75            | (0.09, 6.48)  |
| Non-Hodgkin lymphoma   | 59                                          | 0.172   | 1.40            | (0.87, 2.25) | 41                                | 0.063   | 0.39            | (0.14, 1.05)  | 18                                 | 0.931   | 0.94            | (0.21, 4.21)  |
| Leukemia               | 51                                          | 0.352   | 1.28            | (0.76, 2.15) | 39                                | 0.067   | 0.39            | (0.14, 1.07)  | 12                                 | 0.059   | 3.24            | (0.96, 10.96) |

BMI, body mass index; CI, confidence interval; COPD, chronic obstructive pulmonary diseases; HR, hazard ratio; UADT, upper aero-digestive tract

<sup>a</sup> For excluded diseases and additionally adjusted diseases for each cause of death, see eTable1.

<sup>b</sup> Hazard ratios were calculated using Cox proportional hazards models after adjustment for age at baseline (continuous variable), smoking status (current smoker, former smoker, never-smoker, and those with missing smoking status), alcohol intake (frequency; 5 or more times/week, 1-4 times/week, less than 1 time/week, past drinkers [no alcohol for a year], never drinker, or those with missing information), monthly household income (Korean Won [KRW], 1 United States Dollar = 1170 KRW as of August 1, 2004; < 500,000, 500,000-990,000, 1,000,000-1,490,000, ≥ 1,500,000, those with missing information), and physical activity (yes, no). HRs were not presented for cancers with less than 5 deaths.

**eTable 3. Hazard ratios for cancer mortality associated with standard four categories of BMI**

| Cancer site                      | ICD-10              | BMI<br>(kg/m <sup>2</sup> ) | All participants |                   |         |                 |               | Participants with no pre-existing cancers<br>at baseline <sup>a</sup> |                   |         |                 |               |
|----------------------------------|---------------------|-----------------------------|------------------|-------------------|---------|-----------------|---------------|-----------------------------------------------------------------------|-------------------|---------|-----------------|---------------|
|                                  |                     |                             | Deaths           | Rate <sup>b</sup> | p-value | HR <sup>c</sup> | (95% CI)      | Deaths                                                                | Rate <sup>b</sup> | p-value | HR <sup>c</sup> | (95% CI)      |
| All cancer                       | C00-D48             | 12-18.4                     | 194              | 11,524            | <0.001  | 1.87            | (1.61, 2.17)  | 101                                                                   | 6,453             | 0.003   | 1.36            | (1.11, 1.66)  |
|                                  |                     | 18.5-24.9                   | 2459             | 5,109             |         | 1.00            | (Reference)   | 1854                                                                  | 3,959             |         | 1.00            | (Reference)   |
|                                  |                     | 25.0-29.9                   | 789              | 3,978             | <0.001  | 0.83            | (0.77, 0.9)   | 642                                                                   | 3,303             | 0.081   | 0.92            | (0.84, 1.01)  |
|                                  |                     | 30.0-47                     | 36               | 4,136             | 0.257   | 0.83            | (0.59, 1.15)  | 28                                                                    | 3,272             | 0.593   | 0.90            | (0.62, 1.31)  |
| UADT cancer                      | C00-C15,<br>C30-C32 | 12-18.4                     | 20               | 1,188             | <0.001  | 2.87            | (1.79, 4.61)  | 13                                                                    | 831               | 0.003   | 2.38            | (1.33, 4.24)  |
|                                  |                     | 18.5-24.9                   | 157              | 326               |         | 1.00            | (Reference)   | 127                                                                   | 271               |         | 1.00            | (Reference)   |
|                                  |                     | 25.0-29.9                   | 29               | 146               | 0.001   | 0.51            | (0.34, 0.77)  | 26                                                                    | 134               | 0.013   | 0.58            | (0.38, 0.89)  |
|                                  |                     | 30.0-47                     | 1                | 115               | 0.343   | 0.39            | (0.05, 2.76)  | 1                                                                     | 117               | 0.485   | 0.50            | (0.07, 3.55)  |
| Non-UADT,<br>non-lung cancer     | C16-C26,<br>C37-C97 | 12-18.4                     | 118              | 7,010             | <0.001  | 1.71            | (1.41, 2.06)  | 51                                                                    | 3,259             | 0.537   | 1.09            | (0.82, 1.45)  |
|                                  |                     | 18.5-24.9                   | 1686             | 3,503             |         | 1.00            | (Reference)   | 1229                                                                  | 2,624             |         | 1.00            | (Reference)   |
|                                  |                     | 25.0-29.9                   | 599              | 3,020             | 0.031   | 0.90            | (0.82, 0.99)  | 480                                                                   | 2,470             | 0.866   | 1.01            | (0.91, 1.12)  |
|                                  |                     | 30.0-47                     | 28               | 3,217             | 0.623   | 0.91            | (0.63, 1.32)  | 22                                                                    | 2,571             | 0.857   | 1.04            | (0.68, 1.59)  |
| Oral cavity and<br>larynx cancer | C00-C14             | 12-18.4                     | 7                | 416               | 0.001   | 3.84            | (1.69, 8.71)  | 6                                                                     | 383               | <0.001  | 6.14            | (2.46, 15.38) |
|                                  |                     | 18.5-24.9                   | 39               | 81                |         | 1.00            | (Reference)   | 23                                                                    | 49                |         | 1.00            | (Reference)   |
|                                  |                     | 25.0-29.9                   | 9                | 45                | 0.253   | 0.65            | (0.32, 1.35)  | 8                                                                     | 41                | 0.981   | 1.01            | (0.45, 2.27)  |
|                                  |                     | 30.0-47                     | 1                | 115               | 0.670   | 1.54            | (0.21, 11.23) | 1                                                                     | 117               | 0.328   | 2.72            | (0.37, 20.22) |
| Esophagus cancer                 | C15                 | 12-18.4                     | 6                | 356               | 0.302   | 1.55            | (0.67, 3.58)  | 4                                                                     | 256               | 0.780   | 1.16            | (0.42, 3.18)  |
|                                  |                     | 18.5-24.9                   | 88               | 183               |         | 1.00            | (Reference)   | 80                                                                    | 171               |         | 1.00            | (Reference)   |
|                                  |                     | 25.0-29.9                   | 18               | 91                | 0.032   | 0.57            | (0.34, 0.95)  | 17                                                                    | 87                | 0.062   | 0.60            | (0.36, 1.02)  |
|                                  |                     | 30.0-47                     | 0                | 0                 |         | -               |               | 0                                                                     | 0                 |         | -               |               |
| Stomach cancer                   | C16                 | 12-18.4                     | 41               | 2,436             | <0.001  | 3.09            | (2.22, 4.3)   | 9                                                                     | 575               | 0.912   | 0.96            | (0.49, 1.88)  |
|                                  |                     | 18.5-24.9                   | 322              | 669               |         | 1.00            | (Reference)   | 236                                                                   | 504               |         | 1.00            | (Reference)   |
|                                  |                     | 25.0-29.9                   | 101              | 509               | 0.045   | 0.79            | (0.63, 1)     | 93                                                                    | 479               | 0.757   | 1.04            | (0.82, 1.32)  |
|                                  |                     | 30.0-47                     | 4                | 460               | 0.435   | 0.67            | (0.25, 1.81)  | 3                                                                     | 351               | 0.622   | 0.75            | (0.24, 2.35)  |
| Large intestine cancer           | C18-C21             | 12-18.4                     | 12               | 713               | 0.164   | 1.52            | (0.84, 2.73)  | 7                                                                     | 447               | 0.320   | 1.47            | (0.69, 3.17)  |
|                                  |                     | 18.5-24.9                   | 202              | 420               |         | 1.00            | (Reference)   | 129                                                                   | 275               |         | 1.00            | (Reference)   |
|                                  |                     | 25.0-29.9                   | 94               | 474               | 0.192   | 1.18            | (0.92, 1.51)  | 65                                                                    | 334               | 0.085   | 1.30            | (0.96, 1.76)  |
|                                  |                     | 30.0-47                     | 5                | 574               | 0.466   | 1.39            | (0.57, 3.38)  | 5                                                                     | 584               | 0.067   | 2.31            | (0.94, 5.64)  |
| Liver cancer <sup>d</sup>        | C22                 | 12-18.4                     | 22               | 1,307             | 0.537   | 0.87            | (0.57, 1.34)  | 13                                                                    | 831               | 0.347   | 0.77            | (0.44, 1.33)  |
|                                  |                     | 18.5-24.9                   | 595              | 1,236             |         | 1.00            | (Reference)   | 439                                                                   | 937               |         | 1.00            | (Reference)   |
|                                  |                     | 25.0-29.9                   | 195              | 983               | 0.025   | 0.83            | (0.71, 0.98)  | 148                                                                   | 761               | 0.036   | 0.82            | (0.68, 0.99)  |
|                                  |                     | 30.0-47                     | 12               | 1,379             | 0.817   | 1.07            | (0.6, 1.9)    | 9                                                                     | 1,052             | 0.789   | 1.09            | (0.57, 2.12)  |
| Gall bladder cancer              | C23-C24             | 12-18.4                     | 6                | 356               | 0.271   | 1.60            | (0.69, 3.67)  | 5                                                                     | 319               | 0.185   | 1.86            | (0.74, 4.64)  |
|                                  |                     | 18.5-24.9                   | 88               | 183               |         | 1.00            | (Reference)   | 67                                                                    | 143               |         | 1.00            | (Reference)   |
|                                  |                     | 25.0-29.9                   | 34               | 171               | 0.986   | 1.00            | (0.67, 1.5)   | 31                                                                    | 160               | 0.375   | 1.21            | (0.79, 1.87)  |
|                                  |                     | 30.0-47                     | 1                | 115               | 0.644   | 0.63            | (0.09, 4.51)  | 1                                                                     | 117               | 0.883   | 0.86            | (0.12, 6.22)  |
| Pancreas cancer                  | C25                 | 12-18.4                     | 6                | 356               | 0.625   | 1.23            | (0.54, 2.8)   | 3                                                                     | 192               | 0.650   | 0.77            | (0.24, 2.42)  |
|                                  |                     | 18.5-24.9                   | 128              | 266               |         | 1.00            | (Reference)   | 111                                                                   | 237               |         | 1.00            | (Reference)   |
|                                  |                     | 25.0-29.9                   | 38               | 192               | 0.162   | 0.77            | (0.54, 1.11)  | 33                                                                    | 170               | 0.192   | 0.77            | (0.52, 1.14)  |
|                                  |                     | 30.0-47                     | 2                | 230               | 0.919   | 0.93            | (0.23, 3.76)  | 2                                                                     | 234               | 0.914   | 1.08            | (0.27, 4.38)  |
| Lung cancer <sup>e</sup>         | C33-C34             | 12-18.4                     | 54               | 3,208             | <0.001  | 2.01            | (1.51, 2.66)  | 35                                                                    | 2,236             | 0.011   | 1.57            | (1.11, 2.22)  |
|                                  |                     | 18.5-24.9                   | 594              | 1,234             |         | 1.00            | (Reference)   | 482                                                                   | 1,029             |         | 1.00            | (Reference)   |
|                                  |                     | 25.0-29.9                   | 151              | 761               | <0.001  | 0.70            | (0.58, 0.83)  | 126                                                                   | 648               | 0.003   | 0.74            | (0.61, 0.91)  |
|                                  |                     | 30.0-47                     | 7                | 804               | 0.387   | 0.72            | (0.34, 1.52)  | 5                                                                     | 584               | 0.374   | 0.67            | (0.28, 1.62)  |
| Prostate cancer                  | C61                 | 12-18.4                     | 4                | 238               | 0.010   | 4.08            | (1.4, 11.92)  | 2                                                                     | 128               | 0.021   | 6.02            | (1.31, 27.7)  |
|                                  |                     | 18.5-24.9                   | 26               | 54                |         | 1.00            | (Reference)   | 12                                                                    | 26                |         | 1.00            | (Reference)   |
|                                  |                     | 25.0-29.9                   | 14               | 71                | 0.344   | 1.37            | (0.71, 2.64)  | 8                                                                     | 41                | 0.284   | 1.64            | (0.66, 4.03)  |
|                                  |                     | 30.0-47                     | 2                | 230               | 0.038   | 4.61            | (1.09, 19.5)  | 1                                                                     | 117               | 0.118   | 5.12            | (0.66, 39.68) |
| Kidney cancer                    | C64-C66             | 12-18.4                     | 4                | 238               | 0.078   | 2.55            | (0.9, 7.24)   | 1                                                                     | 64                | 0.974   | 1.03            | (0.14, 7.69)  |
|                                  |                     | 18.5-24.9                   | 38               | 79                |         | 1.00            | (Reference)   | 27                                                                    | 58                |         | 1.00            | (Reference)   |
|                                  |                     | 25.0-29.9                   | 18               | 91                | 0.536   | 1.20            | (0.68, 2.1)   | 10                                                                    | 51                | 0.859   | 0.94            | (0.45, 1.94)  |
|                                  |                     | 30.0-47                     | 0                | 0                 |         | -               |               | 0                                                                     | 0                 |         | -               |               |
| Bladder cancer                   | C67                 | 12-18.4                     | 4                | 238               | 0.042   | 2.99            | (1.04, 8.6)   | 1                                                                     | 64                | 0.841   | 1.23            | (0.16, 9.26)  |
|                                  |                     | 18.5-24.9                   | 31               | 64                |         | 1.00            | (Reference)   | 20                                                                    | 43                |         | 1.00            | (Reference)   |
|                                  |                     | 25.0-29.9                   | 14               | 71                | 0.624   | 1.17            | (0.62, 2.21)  | 10                                                                    | 51                | 0.426   | 1.36            | (0.63, 2.93)  |
|                                  |                     | 30.0-47                     | 0                | 0                 |         | -               |               | 0                                                                     | 0                 |         | -               |               |
| NHL                              | C82-C85             | 12-18.4                     | 0                | 0                 |         | -               |               | 0                                                                     | 0                 |         | -               |               |
|                                  |                     | 18.5-24.9                   | 54               | 112               |         | 1.00            | (Reference)   | 41                                                                    | 88                |         | 1.00            | (Reference)   |
|                                  |                     | 25.0-29.9                   | 20               | 101               | 0.697   | 0.90            | (0.54, 1.51)  | 18                                                                    | 93                | 0.770   | 1.09            | (0.62, 1.9)   |
|                                  |                     | 30.0-47                     | 0                | 0                 |         | -               |               | 0                                                                     | 0                 |         | -               |               |
| Leukemia                         | C91-C95             | 12-18.4                     | 1                | 59                | 0.580   | 0.57            | (0.08, 4.16)  | 0                                                                     | 0                 |         | -               |               |
|                                  |                     | 18.5-24.9                   | 44               | 91                |         | 1.00            | (Reference)   | 39                                                                    | 83                |         | 1.00            | (Reference)   |
|                                  |                     | 25.0-29.9                   | 14               | 71                | 0.463   | 0.80            | (0.44, 1.46)  | 12                                                                    | 62                | 0.379   | 0.75            | (0.39, 1.43)  |
|                                  |                     | 30.0-47                     | 0                | 0                 |         | -               |               | 0                                                                     | 0                 |         | -               |               |

- BMI, body mass index; CI, confidence interval; COPD, chronic obstructive pulmonary diseases; CVD, cerebrovascular diseases; HR, hazard ratio; ICD-10, International Classification of Diseases 10<sup>th</sup> Revision; IHD, ischemic heart disease; NHL, non-Hodgkin lymphoma; UADT, upper aero-digestive tract
- <sup>a</sup> For pre-existing diseases excluded for each cause of death, see eTable 1.
- <sup>b</sup> Crude death rate per 1,000,000 person-years
- <sup>c</sup> Hazard ratios were calculated using Cox proportional hazards models after adjustment for age at baseline (continuous variable), smoking status (current smoker, former smoker, never-smoker, and those with missing smoking status), alcohol intake (frequency; 5 or more times/week, 1-4 times/week, less than 1 time/week, past drinkers [no alcohol for a year], never drinker, or those with missing information), monthly household income (Korean Won [KRW], 1 United States Dollar = 1170 KRW as of August 1, 2004; < 500,000, 500,000-990,000, 1,000,000-1,490,000, ≥ 1,500,000, those with missing information), and physical activity (yes, no).
- <sup>d</sup> Additional adjustment for viral hepatitis and liver diseases at baseline was done in the Cox model.
- <sup>e</sup> Additional adjustment for respiratory diseases (COPD, pneumonia, and tuberculosis) at baseline was done in the Cox model.

**eTable 4. Hazard ratios for cancer mortality associated with seven categories of BMI (Numerical version of Figures 1, and eFigures 2)**

| Cancer site                   | ICD-10           | BMI (kg/m <sup>2</sup> ) | All participants |                   |         |                 |               | Participants with no pre-existing cancers at baseline <sup>a</sup> |                   |         |                 |               |
|-------------------------------|------------------|--------------------------|------------------|-------------------|---------|-----------------|---------------|--------------------------------------------------------------------|-------------------|---------|-----------------|---------------|
|                               |                  |                          | Deaths           | Rate <sup>b</sup> | p-value | HR <sup>c</sup> | (95% CI)      | Deaths                                                             | Rate <sup>b</sup> | p-value | HR <sup>c</sup> | (95% CI)      |
| All cancer                    | C00-D48          | 12-18.4                  | 194              | 11,524            | <0.001  | 2.36            | (2, 2.78)     | 101                                                                | 6453              | <0.001  | 1.54            | (1.24, 1.91)  |
|                               |                  | 18.5-20.9                | 623              | 6,908             | <0.001  | 1.57            | (1.4, 1.76)   | 419                                                                | 4848              | 0.001   | 1.26            | (1.11, 1.44)  |
|                               |                  | 21.0-22.9                | 893              | 5,240             | <0.001  | 1.27            | (1.14, 1.41)  | 696                                                                | 4197              | 0.006   | 1.18            | (1.05, 1.32)  |
|                               |                  | 23.0-24.9                | 943              | 4,273             | 0.126   | 1.08            | (0.98, 1.2)   | 739                                                                | 3421              | 0.752   | 1.02            | (0.91, 1.14)  |
|                               |                  | 25.0-27.4                | 596              | 3,830             |         | 1.00            | (Reference)   | 487                                                                | 3193              |         | 1.00            | (Reference)   |
|                               |                  | 27.5-29.9                | 193              | 4,519             | 0.067   | 1.16            | (0.99, 1.37)  | 155                                                                | 3705              | 0.110   | 1.16            | (0.97, 1.39)  |
|                               |                  | 30.0-47                  | 36               | 4,136             | 0.864   | 1.03            | (0.74, 1.44)  | 28                                                                 | 3272              | 0.943   | 1.01            | (0.69, 1.48)  |
| UADT cancer                   | C00-C15,         | 12-18.4                  | 20               | 1,188             | <0.001  | 6.13            | (3.3, 11.38)  | 13                                                                 | 831               | <0.001  | 4.38            | (2.15, 8.93)  |
|                               |                  | C30-C32                  | 18.5-20.9        | 58                | 643     | <0.001          | 3.63          | (2.21, 5.98)                                                       | 43                | 498     | <0.001          | 2.87          |
|                               |                  | 21.0-22.9                | 61               | 358               | 0.002   | 2.20            | (1.35, 3.6)   | 50                                                                 | 302               | 0.014   | 1.93            | (1.14, 3.25)  |
|                               |                  | 23.0-24.9                | 38               | 172               | 0.593   | 1.15            | (0.68, 1.95)  | 34                                                                 | 157               | 0.697   | 1.12            | (0.64, 1.94)  |
|                               |                  | 25.0-27.4                | 22               | 141               |         | 1.00            | (Reference)   | 20                                                                 | 131               |         | 1.00            | (Reference)   |
|                               |                  | 27.5-29.9                | 7                | 164               | 0.743   | 1.15            | (0.49, 2.7)   | 6                                                                  | 143               | 0.843   | 1.10            | (0.44, 2.73)  |
|                               |                  | 30.0-47                  | 1                | 115               | 0.813   | 0.79            | (0.11, 5.83)  | 1                                                                  | 117               | 0.897   | 0.88            | (0.12, 6.53)  |
| Non-UADT, non-lung cancer     | C16-C26, C37-C97 | 12-18.4                  | 118              | 7,010             | <0.001  | 1.95            | (1.59, 2.39)  | 51                                                                 | 3259              | 0.477   | 1.11            | (0.83, 1.5)   |
|                               |                  | 18.5-20.9                | 395              | 4,380             | <0.001  | 1.34            | (1.17, 1.54)  | 237                                                                | 2742              | 0.989   | 1.00            | (0.85, 1.18)  |
|                               |                  | 21.0-22.9                | 611              | 3,586             | 0.021   | 1.15            | (1.02, 1.3)   | 468                                                                | 2822              | 0.248   | 1.08            | (0.95, 1.24)  |
|                               |                  | 23.0-24.9                | 680              | 3,081             | 0.706   | 1.02            | (0.91, 1.15)  | 524                                                                | 2426              | 0.663   | 0.97            | (0.85, 1.11)  |
|                               |                  | 25.0-27.4                | 460              | 2,956             |         | 1.00            | (Reference)   | 367                                                                | 2406              |         | 1.00            | (Reference)   |
|                               |                  | 27.5-29.9                | 139              | 3,254             | 0.408   | 1.08            | (0.9, 1.31)   | 113                                                                | 2701              | 0.291   | 1.12            | (0.91, 1.38)  |
|                               |                  | 30.0-47                  | 28               | 3,217             | 0.879   | 1.03            | (0.7, 1.51)   | 22                                                                 | 2571              | 0.800   | 1.06            | (0.69, 1.63)  |
| Oral cavity and larynx cancer | C00-C14          | 12-18.4                  | 7                | 416               | 0.001   | 7.20            | (2.36, 21.94) | 6                                                                  | 383               | 0.001   | 7.83            | (2.32, 26.5)  |
|                               |                  | 18.5-20.9                | 14               | 155               | 0.024   | 3.04            | (1.16, 8.02)  | 7                                                                  | 81                | 0.338   | 1.77            | (0.55, 5.65)  |
|                               |                  | 21.0-22.9                | 15               | 88                | 0.173   | 1.94            | (0.75, 5.02)  | 10                                                                 | 60                | 0.462   | 1.50            | (0.51, 4.41)  |
|                               |                  | 23.0-24.9                | 10               | 45                | 0.852   | 1.10            | (0.4, 3.03)   | 6                                                                  | 28                | 0.672   | 0.77            | (0.24, 2.54)  |
|                               |                  | 25.0-27.4                | 6                | 39                |         | 1.00            | (Reference)   | 5                                                                  | 33                |         | 1.00            | (Reference)   |
|                               |                  | 27.5-29.9                | 3                | 70                | 0.407   | 1.80            | (0.45, 7.19)  | 3                                                                  | 72                | 0.295   | 2.15            | (0.51, 9)     |
|                               |                  | 30.0-47                  | 1                | 115               | 0.343   | 2.79            | (0.33, 23.18) | 1                                                                  | 117               | 0.266   | 3.38            | (0.39, 29.02) |
| Esophagus cancer              | C15              | 12-18.4                  | 6                | 356               | 0.030   | 2.93            | (1.11, 7.76)  | 4                                                                  | 256               | 0.250   | 1.94            | (0.63, 5.99)  |
|                               |                  | 18.5-20.9                | 35               | 388               | <0.001  | 3.46            | (1.84, 6.5)   | 30                                                                 | 347               | 0.001   | 2.90            | (1.52, 5.53)  |
|                               |                  | 21.0-22.9                | 32               | 188               | 0.066   | 1.81            | (0.96, 3.4)   | 29                                                                 | 175               | 0.150   | 1.60            | (0.84, 3.05)  |
|                               |                  | 23.0-24.9                | 21               | 95                | 0.996   | 1.00            | (0.51, 1.97)  | 21                                                                 | 97                | 0.974   | 0.99            | (0.5, 1.95)   |
|                               |                  | 25.0-27.4                | 14               | 90                |         | 1.00            | (Reference)   | 14                                                                 | 92                |         | 1.00            | (Reference)   |
|                               |                  | 27.5-29.9                | 4                | 94                | 0.950   | 1.04            | (0.34, 3.15)  | 3                                                                  | 72                | 0.702   | 0.78            | (0.23, 2.73)  |
|                               |                  | 30.0-47                  | 0                | 0                 |         | -               |               | 0                                                                  | 0                 | 0.985   | 0.00            | (0, 0)        |
| Stomach cancer                | C16              | 12-18.4                  | 41               | 2,436             | <0.001  | 4.04            | (2.75, 5.95)  | 9                                                                  | 575               | 0.796   | 0.91            | (0.45, 1.83)  |
|                               |                  | 18.5-20.9                | 94               | 1,042             | <0.001  | 1.90            | (1.4, 2.58)   | 59                                                                 | 683               | 0.355   | 1.18            | (0.83, 1.67)  |
|                               |                  | 21.0-22.9                | 114              | 669               | 0.097   | 1.28            | (0.96, 1.71)  | 79                                                                 | 476               | 0.421   | 0.88            | (0.64, 1.21)  |
|                               |                  | 23.0-24.9                | 114              | 517               | 0.912   | 1.02            | (0.76, 1.36)  | 98                                                                 | 454               | 0.418   | 0.88            | (0.65, 1.19)  |
|                               |                  | 25.0-27.4                | 78               | 501               |         | 1.00            | (Reference)   | 75                                                                 | 492               |         | 1.00            | (Reference)   |
|                               |                  | 27.5-29.9                | 23               | 538               | 0.817   | 1.06            | (0.66, 1.68)  | 18                                                                 | 430               | 0.610   | 0.87            | (0.52, 1.46)  |
|                               |                  | 30.0-47                  | 4                | 460               | 0.776   | 0.86            | (0.32, 2.36)  | 3                                                                  | 351               | 0.552   | 0.70            | (0.22, 2.23)  |
| Large intestine cancer        | C18-C21          | 12-18.4                  | 12               | 713               | 0.449   | 1.27            | (0.69, 2.35)  | 7                                                                  | 447               | 0.814   | 1.10            | (0.5, 2.44)   |
|                               |                  | 18.5-20.9                | 50               | 554               | 0.719   | 1.07            | (0.74, 1.54)  | 25                                                                 | 289               | 0.252   | 0.75            | (0.47, 1.22)  |
|                               |                  | 21.0-22.9                | 77               | 452               | 0.470   | 0.89            | (0.65, 1.22)  | 55                                                                 | 332               | 0.540   | 0.89            | (0.61, 1.3)   |
|                               |                  | 23.0-24.9                | 75               | 340               | 0.017   | 0.68            | (0.49, 0.93)  | 49                                                                 | 227               | 0.017   | 0.62            | (0.42, 0.92)  |
|                               |                  | 25.0-27.4                | 76               | 488               |         | 1.00            | (Reference)   | 53                                                                 | 348               |         | 1.00            | (Reference)   |
|                               |                  | 27.5-29.9                | 18               | 421               | 0.569   | 0.86            | (0.52, 1.44)  | 12                                                                 | 287               | 0.571   | 0.83            | (0.45, 1.56)  |
|                               |                  | 30.0-47                  | 5                | 574               | 0.763   | 1.15            | (0.46, 2.84)  | 5                                                                  | 584               | 0.252   | 1.71            | (0.68, 4.28)  |
| Liver cancer <sup>d</sup>     | C22              | 12-18.4                  | 22               | 1,307             | 0.673   | 1.10            | (0.7, 1.73)   | 13                                                                 | 831               | 0.994   | 1.00            | (0.56, 1.78)  |
|                               |                  | 18.5-20.9                | 143              | 1,586             | 0.001   | 1.49            | (1.18, 1.88)  | 92                                                                 | 1065              | 0.028   | 1.37            | (1.03, 1.82)  |
|                               |                  | 21.0-22.9                | 214              | 1,256             | 0.031   | 1.26            | (1.02, 1.56)  | 162                                                                | 977               | 0.016   | 1.35            | (1.06, 1.73)  |
|                               |                  | 23.0-24.9                | 238              | 1,078             | 0.231   | 1.13            | (0.92, 1.39)  | 185                                                                | 856               | 0.100   | 1.22            | (0.96, 1.55)  |
|                               |                  | 25.0-27.4                | 147              | 945               |         | 1.00            | (Reference)   | 109                                                                | 715               |         | 1.00            | (Reference)   |
|                               |                  | 27.5-29.9                | 48               | 1,124             | 0.371   | 1.16            | (0.84, 1.61)  | 39                                                                 | 932               | 0.210   | 1.26            | (0.88, 1.82)  |
|                               |                  | 30.0-47                  | 12               | 1,379             | 0.333   | 1.34            | (0.74, 2.41)  | 9                                                                  | 1052              | 0.315   | 1.42            | (0.72, 2.8)   |
| Gall bladder cancer           | C23-C24          | 12-18.4                  | 6                | 356               | 0.156   | 1.94            | (0.78, 4.84)  | 5                                                                  | 319               | 0.225   | 1.85            | (0.68, 5)     |
|                               |                  | 18.5-20.9                | 18               | 200               | 0.538   | 1.22            | (0.65, 2.29)  | 8                                                                  | 93                | 0.213   | 0.59            | (0.26, 1.35)  |
|                               |                  | 21.0-22.9                | 38               | 223               | 0.160   | 1.46            | (0.86, 2.48)  | 34                                                                 | 205               | 0.222   | 1.41            | (0.81, 2.47)  |
|                               |                  | 23.0-24.9                | 32               | 145               | 0.983   | 0.99            | (0.58, 1.71)  | 25                                                                 | 116               | 0.576   | 0.85            | (0.47, 1.52)  |
|                               |                  | 25.0-27.4                | 22               | 141               |         | 1.00            | (Reference)   | 20                                                                 | 131               |         | 1.00            | (Reference)   |
|                               |                  | 27.5-29.9                | 12               | 281               | 0.065   | 1.94            | (0.96, 3.92)  | 11                                                                 | 263               | 0.070   | 1.98            | (0.95, 4.12)  |
|                               |                  | 30.0-47                  | 1                | 115               | 0.785   | 0.76            | (0.1, 5.62)   | 1                                                                  | 117               | 0.884   | 0.86            | (0.12, 6.42)  |

| Cancer site              | ICD-10  | BMI<br>(kg/m <sup>2</sup> ) | All participants |                   |         |                 |               | Participants with no pre-existing cancers<br>at baseline <sup>a</sup> |                   |         |                 |               |
|--------------------------|---------|-----------------------------|------------------|-------------------|---------|-----------------|---------------|-----------------------------------------------------------------------|-------------------|---------|-----------------|---------------|
|                          |         |                             | Deaths           | Rate <sup>b</sup> | p-value | HR <sup>c</sup> | (95% CI)      | Deaths                                                                | Rate <sup>b</sup> | p-value | HR <sup>c</sup> | (95% CI)      |
| Pancreas cancer          | C25     | 12-18.4                     | 6                | 356               | 0.315   | 1.58            | (0.65, 3.82)  | 3                                                                     | 192               | 0.935   | 0.95            | (0.29, 3.16)  |
|                          |         | 18.5-20.9                   | 23               | 255               | 0.550   | 1.18            | (0.68, 2.05)  | 18                                                                    | 208               | 0.873   | 1.05            | (0.57, 1.92)  |
|                          |         | 21.0-22.9                   | 45               | 264               | 0.315   | 1.27            | (0.8, 2.02)   | 44                                                                    | 265               | 0.189   | 1.38            | (0.85, 2.24)  |
|                          |         | 23.0-24.9                   | 60               | 272               | 0.181   | 1.35            | (0.87, 2.09)  | 49                                                                    | 227               | 0.410   | 1.22            | (0.76, 1.95)  |
|                          |         | 25.0-27.4                   | 30               | 193               |         | 1.00            | (Reference)   | 27                                                                    | 177               |         | 1.00            | (Reference)   |
|                          |         | 27.5-29.9                   | 8                | 187               | 0.948   | 0.97            | (0.45, 2.13)  | 6                                                                     | 143               | 0.652   | 0.82            | (0.34, 1.98)  |
| Lung cancer <sup>c</sup> | C33-C34 | 30.0-47                     | 2                | 230               | 0.804   | 1.20            | (0.29, 5.02)  | 2                                                                     | 234               | 0.686   | 1.34            | (0.32, 5.66)  |
|                          |         | 12-18.4                     | 54               | 3,208             | <0.001  | 3.31            | (2.37, 4.61)  | 35                                                                    | 2236              | <0.001  | 2.34            | (1.57, 3.48)  |
|                          |         | 18.5-20.9                   | 164              | 1,818             | <0.001  | 2.14            | (1.67, 2.75)  | 135                                                                   | 1562              | <0.001  | 1.92            | (1.47, 2.52)  |
|                          |         | 21.0-22.9                   | 212              | 1,244             | <0.001  | 1.62            | (1.28, 2.04)  | 171                                                                   | 1031              | 0.005   | 1.44            | (1.12, 1.86)  |
|                          |         | 23.0-24.9                   | 218              | 988               | 0.006   | 1.38            | (1.1, 1.75)   | 176                                                                   | 815               | 0.071   | 1.26            | (0.98, 1.63)  |
|                          |         | 25.0-27.4                   | 105              | 675               |         | 1.00            | (Reference)   | 91                                                                    | 597               |         | 1.00            | (Reference)   |
| Prostate cancer          | C61     | 27.5-29.9                   | 46               | 1,077             | 0.009   | 1.58            | (1.12, 2.24)  | 35                                                                    | 837               | 0.091   | 1.40            | (0.95, 2.07)  |
|                          |         | 30.0-47                     | 7                | 804               | 0.692   | 1.17            | (0.54, 2.51)  | 5                                                                     | 584               | 0.969   | 0.98            | (0.4, 2.42)   |
|                          |         | 12-18.4                     | 4                | 238               | 0.125   | 2.46            | (0.78, 7.79)  | 2                                                                     | 128               | 0.150   | 3.29            | (0.65, 16.58) |
|                          |         | 18.5-20.9                   | 3                | 33                | 0.136   | 0.38            | (0.11, 1.35)  | 1                                                                     | 12                | 0.227   | 0.27            | (0.03, 2.25)  |
|                          |         | 21.0-22.9                   | 8                | 47                | 0.172   | 0.54            | (0.22, 1.31)  | 5                                                                     | 30                | 0.481   | 0.66            | (0.21, 2.09)  |
|                          |         | 23.0-24.9                   | 15               | 68                | 0.478   | 0.76            | (0.36, 1.61)  | 6                                                                     | 28                | 0.318   | 0.57            | (0.19, 1.71)  |
| Kidney cancer            | C64-C66 | 25.0-27.4                   | 13               | 84                |         | 1.00            | (Reference)   | 7                                                                     | 46                |         | 1.00            | (Reference)   |
|                          |         | 27.5-29.9                   | 1                | 23                | 0.225   | 0.28            | (0.04, 2.17)  | 1                                                                     | 24                | 0.576   | 0.55            | (0.07, 4.47)  |
|                          |         | 30.0-47                     | 2                | 230               | 0.173   | 2.82            | (0.63, 12.57) | 1                                                                     | 117               | 0.332   | 2.83            | (0.35, 23.11) |
|                          |         | 12-18.4                     | 4                | 238               | 0.304   | 1.79            | (0.59, 5.43)  | 1                                                                     | 64                | 0.987   | 0.98            | (0.12, 7.91)  |
|                          |         | 18.5-20.9                   | 10               | 111               | 0.840   | 0.92            | (0.42, 2.04)  | 6                                                                     | 69                | 0.848   | 1.11            | (0.39, 3.16)  |
|                          |         | 21.0-22.9                   | 14               | 82                | 0.363   | 0.72            | (0.35, 1.46)  | 12                                                                    | 72                | 0.718   | 1.17            | (0.49, 2.8)   |
| Bladder cancer           | C67     | 23.0-24.9                   | 14               | 63                | 0.122   | 0.57            | (0.28, 1.16)  | 9                                                                     | 42                | 0.422   | 0.68            | (0.27, 1.73)  |
|                          |         | 25.0-27.4                   | 17               | 109               |         | 1.00            | (Reference)   | 9                                                                     | 59                |         | 1.00            | (Reference)   |
|                          |         | 27.5-29.9                   | 1                | 23                | 0.127   | 0.21            | (0.03, 1.56)  | 1                                                                     | 24                | 0.393   | 0.41            | (0.05, 3.21)  |
|                          |         | 30.0-47                     | 0                | 0                 |         | -               |               | 0                                                                     | 0                 |         | -               |               |
|                          |         | 12-18.4                     | 4                | 238               | 0.145   | 2.37            | (0.74, 7.53)  | 1                                                                     | 64                | 0.836   | 0.80            | (0.1, 6.48)   |
|                          |         | 18.5-20.9                   | 8                | 89                | 0.995   | 1.00            | (0.4, 2.48)   | 5                                                                     | 58                | 0.692   | 0.80            | (0.26, 2.43)  |
| NHL                      | C82-C85 | 21.0-22.9                   | 14               | 82                | 0.983   | 0.99            | (0.46, 2.15)  | 10                                                                    | 60                | 0.817   | 0.90            | (0.36, 2.23)  |
|                          |         | 23.0-24.9                   | 9                | 41                | 0.125   | 0.51            | (0.21, 1.21)  | 5                                                                     | 23                | 0.069   | 0.36            | (0.12, 1.08)  |
|                          |         | 25.0-27.4                   | 12               | 77                |         | 1.00            | (Reference)   | 9                                                                     | 59                |         | 1.00            | (Reference)   |
|                          |         | 27.5-29.9                   | 2                | 47                | 0.477   | 0.58            | (0.13, 2.6)   | 1                                                                     | 24                | 0.377   | 0.39            | (0.05, 3.11)  |
|                          |         | 30.0-47                     | 0                | 0                 |         | -               |               | 0                                                                     | 0                 |         | -               |               |
|                          |         | 12-18.4                     | 0                | 0                 |         | -               |               | 0                                                                     | 0                 |         | -               |               |
| Leukemia                 | C91-C95 | 18.5-20.9                   | 6                | 67                | 0.397   | 0.66            | (0.25, 1.72)  | 3                                                                     | 35                | 0.127   | 0.37            | (0.11, 1.32)  |
|                          |         | 21.0-22.9                   | 20               | 117               | 0.594   | 1.20            | (0.61, 2.35)  | 16                                                                    | 96                | 0.833   | 1.08            | (0.52, 2.26)  |
|                          |         | 23.0-24.9                   | 28               | 127               | 0.393   | 1.31            | (0.7, 2.46)   | 22                                                                    | 102               | 0.643   | 1.18            | (0.59, 2.34)  |
|                          |         | 25.0-27.4                   | 15               | 96                |         | 1.00            | (Reference)   | 13                                                                    | 85                |         | 1.00            | (Reference)   |
|                          |         | 27.5-29.9                   | 5                | 117               | 0.729   | 1.20            | (0.43, 3.29)  | 5                                                                     | 120               | 0.538   | 1.38            | (0.49, 3.88)  |
|                          |         | 30.0-47                     | 0                | 0                 |         | -               |               | 0                                                                     | 0                 |         | -               |               |
|                          |         | 12-18.4                     | 1                | 59                | 0.875   | 0.85            | (0.11, 6.75)  | 0                                                                     | 0                 |         | -               |               |
|                          |         | 18.5-20.9                   | 4                | 44                | 0.533   | 0.69            | (0.21, 2.24)  | 3                                                                     | 35                | 0.632   | 0.72            | (0.18, 2.79)  |
|                          |         | 21.0-22.9                   | 16               | 94                | 0.300   | 1.54            | (0.68, 3.51)  | 16                                                                    | 96                | 0.113   | 2.06            | (0.84, 5.02)  |
|                          |         | 23.0-24.9                   | 24               | 109               | 0.116   | 1.85            | (0.86, 3.98)  | 20                                                                    | 93                | 0.113   | 2.01            | (0.85, 4.75)  |
|                          |         | 25.0-27.4                   | 9                | 58                |         | 1.00            | (Reference)   | 7                                                                     | 46                |         | 1.00            | (Reference)   |
|                          |         | 27.5-29.9                   | 5                | 117               | 0.230   | 1.95            | (0.65, 5.83)  | 5                                                                     | 120               | 0.113   | 2.53            | (0.8, 7.96)   |
|                          |         | 30.0-47                     | 0                | 0                 |         | -               |               | 0                                                                     | 0                 |         | -               |               |

BMI, body mass index; CI, confidence interval; COPD, chronic obstructive pulmonary diseases; CVD, cerebrovascular diseases; HR, hazard ratio; ICD-10, International Classification of Diseases 10<sup>th</sup> Revision; IHD, ischemic heart disease; NHL, non-Hodgkin lymphoma; UADT, upper aero-digestive tract

<sup>a</sup> For pre-existing diseases excluded for each cause of death, see eTable 1.

<sup>b</sup> Crude death rate per 1,000,000 person-years

<sup>c</sup> Hazard ratios were calculated using Cox proportional hazards models after adjustment for age at baseline (continuous variable), smoking status (current smoker, former smoker, never-smoker, and those with missing smoking status), alcohol intake (frequency; 5 or more times/week, 1-4 times/week, less than 1 time/week, past drinkers [no alcohol for a year], never drinker, or those with missing information), monthly household income (Korean Won [KRW], 1 United States Dollar = 1170 KRW as of August 1, 2004; < 500,000, 500,000-990,000, 1,000,000-1,490,000, ≥ 1,500,000, those with missing information), and physical activity (yes, no).

<sup>d</sup> Additional adjustment for viral hepatitis and liver diseases at baseline was done in the Cox model.

<sup>e</sup> Additional adjustment for respiratory diseases (COPD, pneumonia, and tuberculosis) at baseline was done in the Cox model.

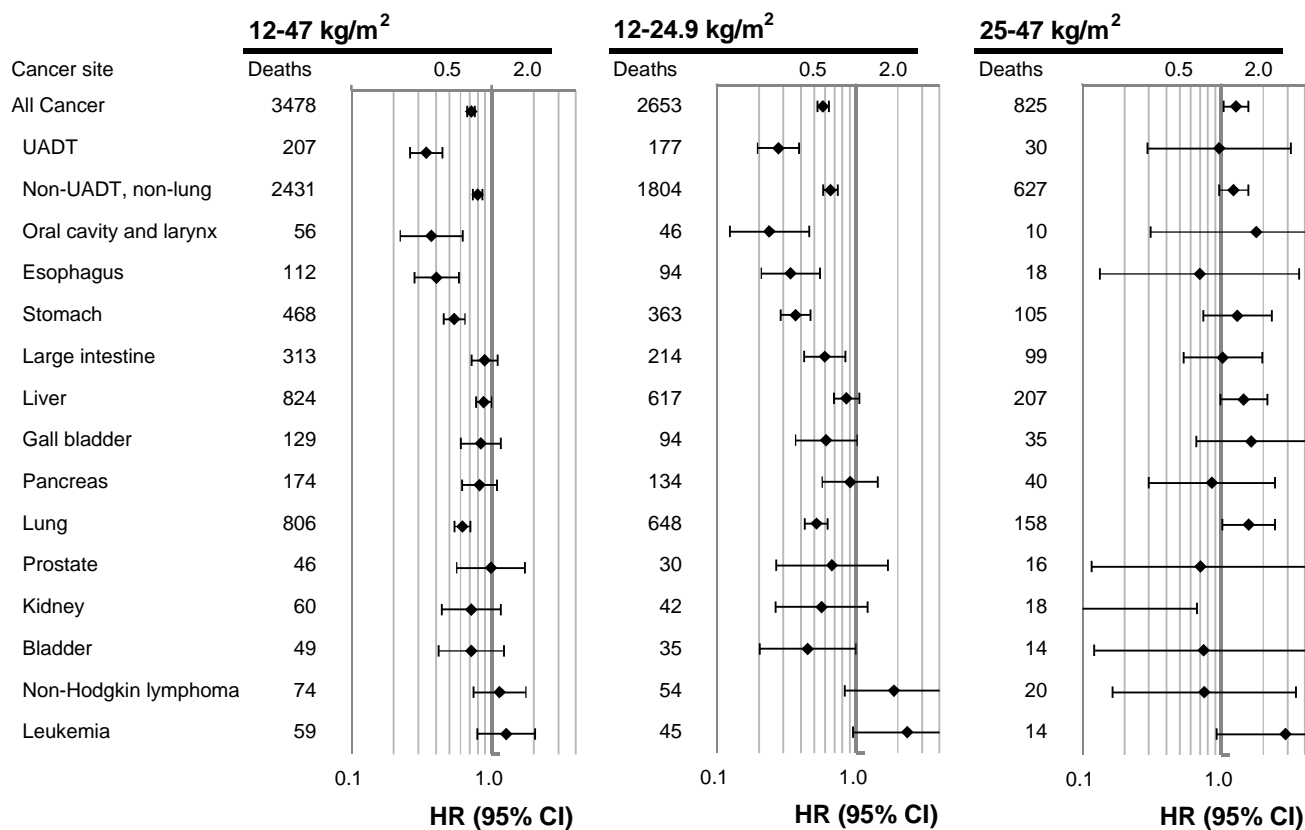

**eFigure 1. Hazard ratios for cancer mortality per 5 kg/m<sup>2</sup> higher BMI across BMI groups.** Analyses were adjusted for age, smoking, alcohol intake, household income, and physical activity. Cancers which had 10 or more cases in 12-24.9 or 25-47 kg/m<sup>2</sup> among all participants were included.

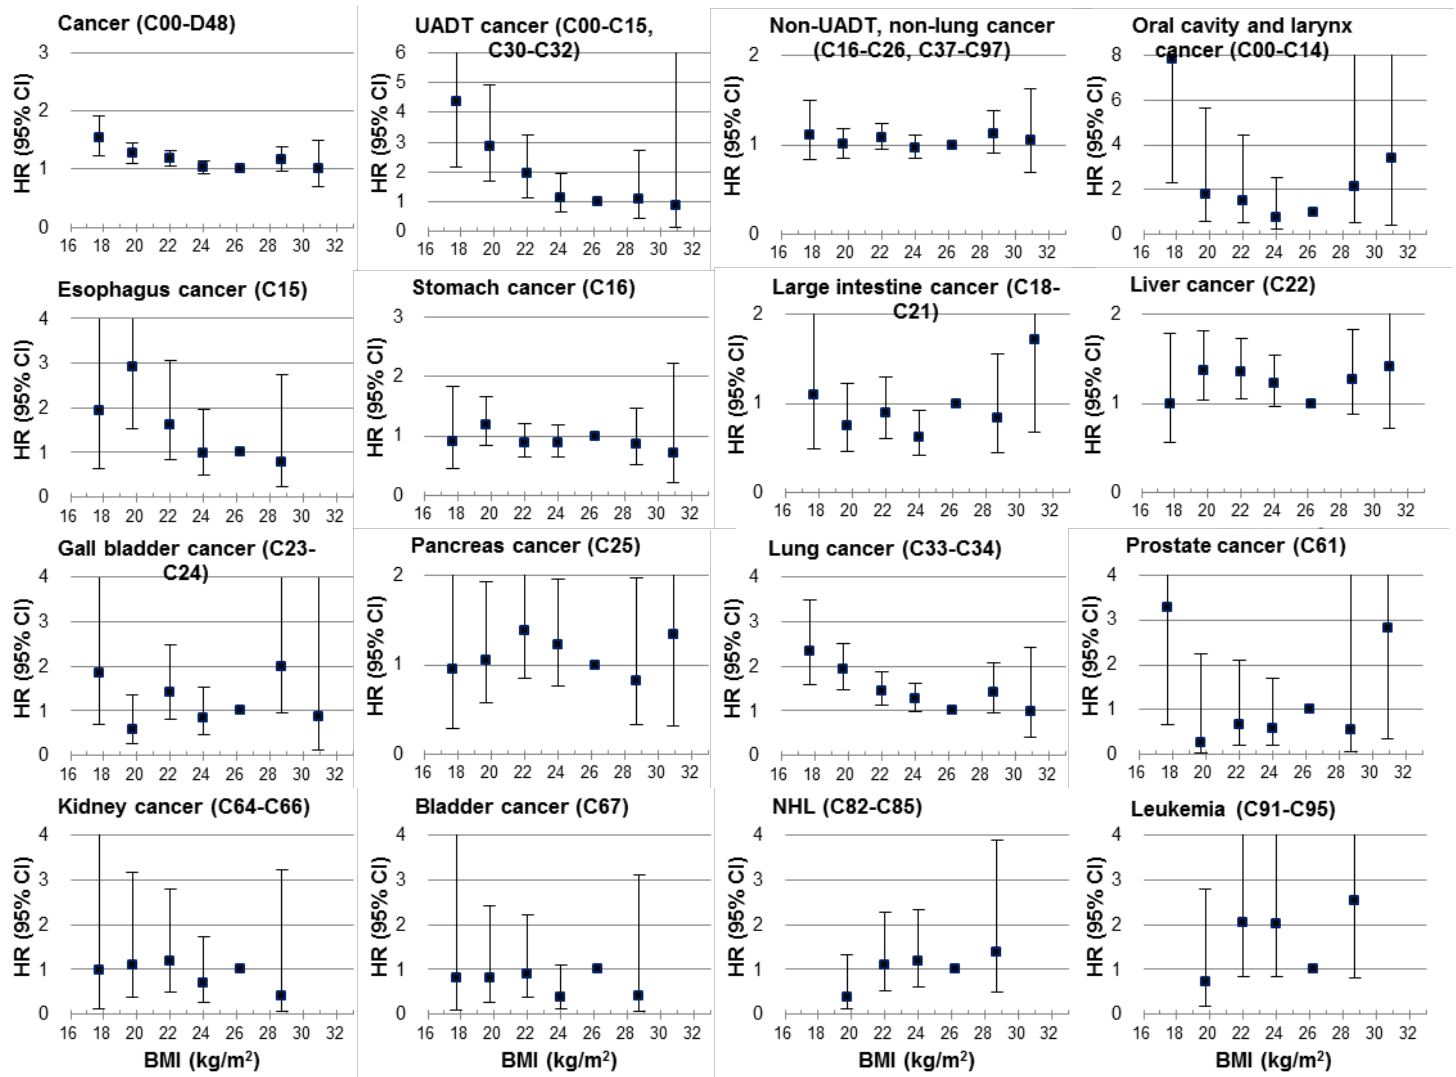

**Figure 2. Hazard ratios for cancer mortality in participants with no pre-existing cancers at baseline across seven categories of BMI.** The midpoint BMI was used as a representative value for each category (kg/m<sup>2</sup>; 12-18.4, 18.5-20.9, 21-22.9, 23-24.9, 25-27.4 [Reference], 27.5-29.9, 30.0-47), except for both ends of BMI categories, in which the median was used. Analyses were adjusted for age, smoking, alcohol intake, household income, and physical activity. For some causes, no death was observed in the highest or the lowest BMI categories.



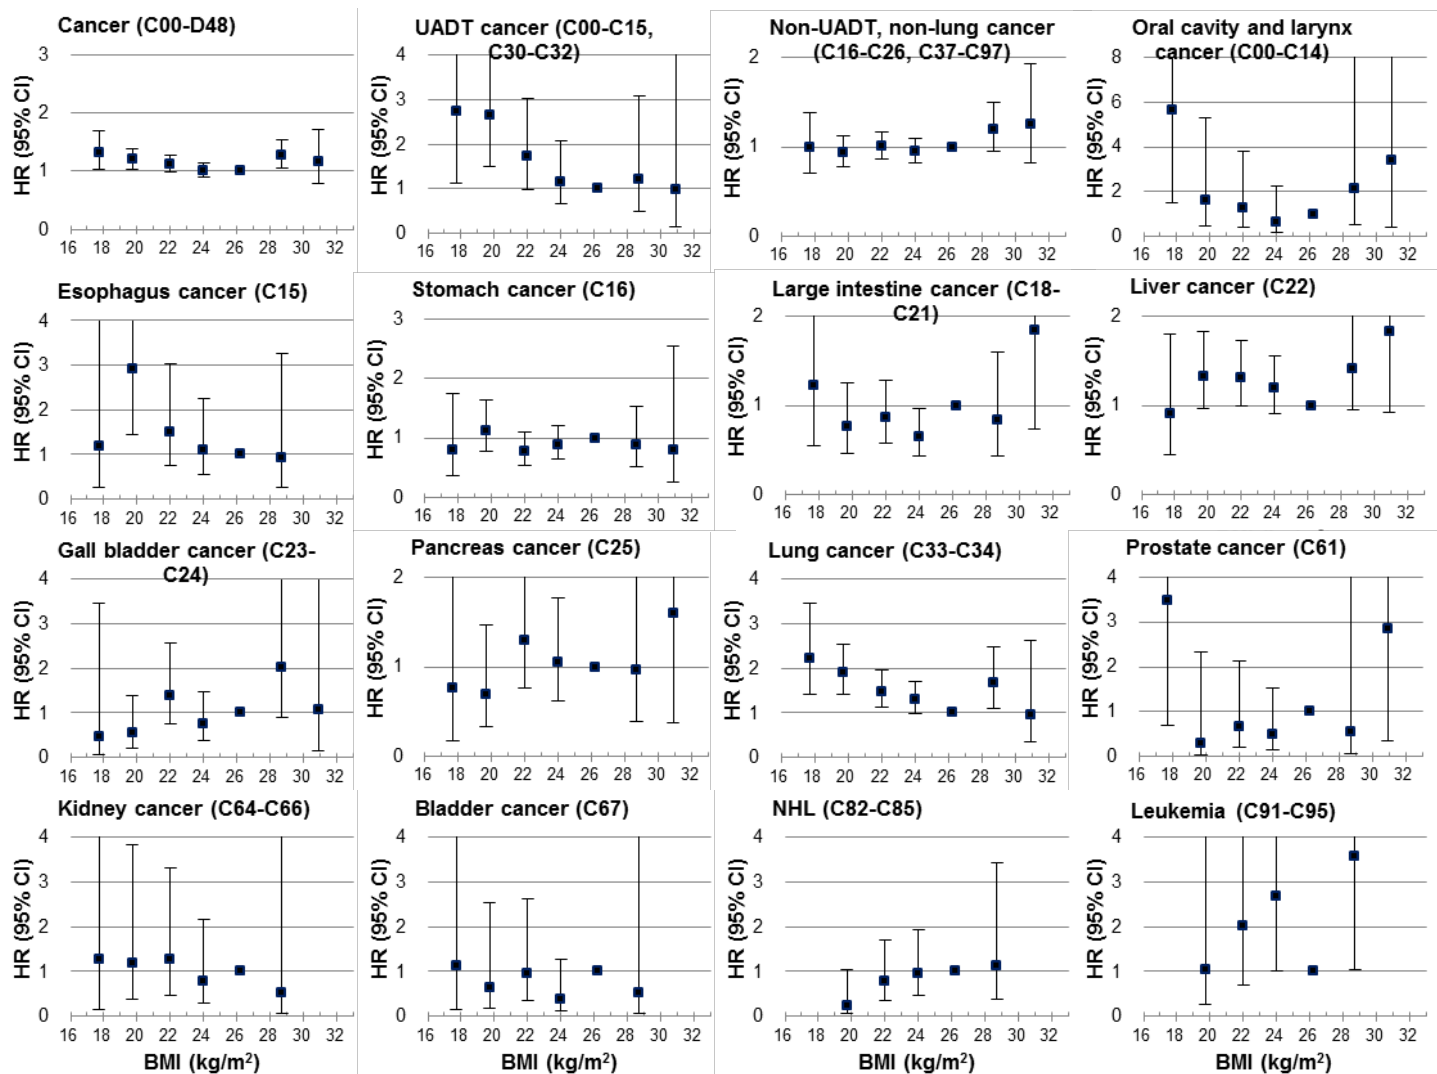

**Figure 3. Hazard ratios for cancer mortality after exclusion of the first two years of follow-up and pre-existing cancers at baseline across seven categories of BMI.** The midpoint BMI was used as a representative value for each category ( $\text{kg/m}^2$ ; 12-18.4, 18.5-20.9, 21-22.9, 23-24.9, 25-27.4 [Reference], 27.5-29.9, 30.0-47), except for both ends of BMI categories, in which the median was used. Analyses were adjusted for age, smoking, alcohol intake, household income, and physical activity. For some causes, no death was observed in the highest or the lowest BMI categories.

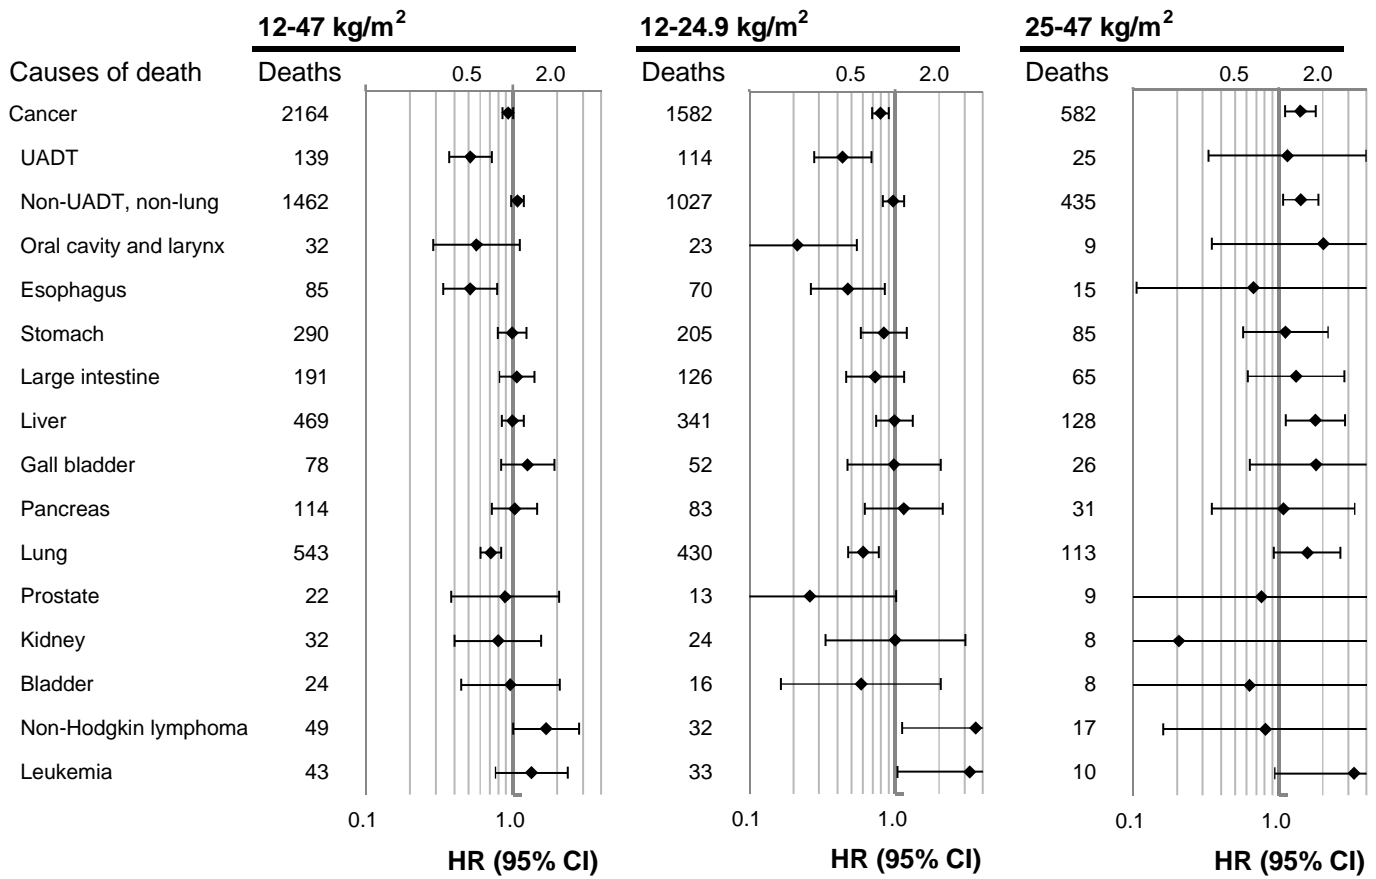

**eFigure 4. Hazard ratios for cancer mortality per 5 kg/m<sup>2</sup> higher BMI across BMI groups after exclusion of the first two years of follow-up and pre-existing cancers at baseline.** Analyses were adjusted for age, smoking, alcohol intake, household income, and physical activity. Cancers which had 10 or more cases in 12-24.9 or 25-47 kg/m<sup>2</sup> among all participants were included

### 12-47 kg/m<sup>2</sup>

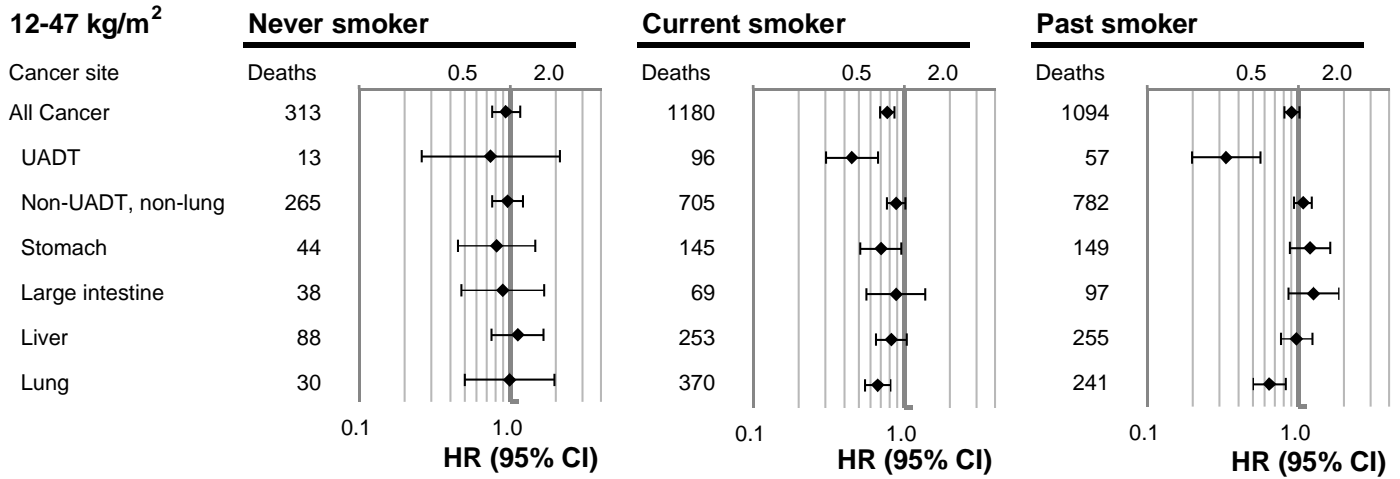

### 12-24.9 kg/m<sup>2</sup>

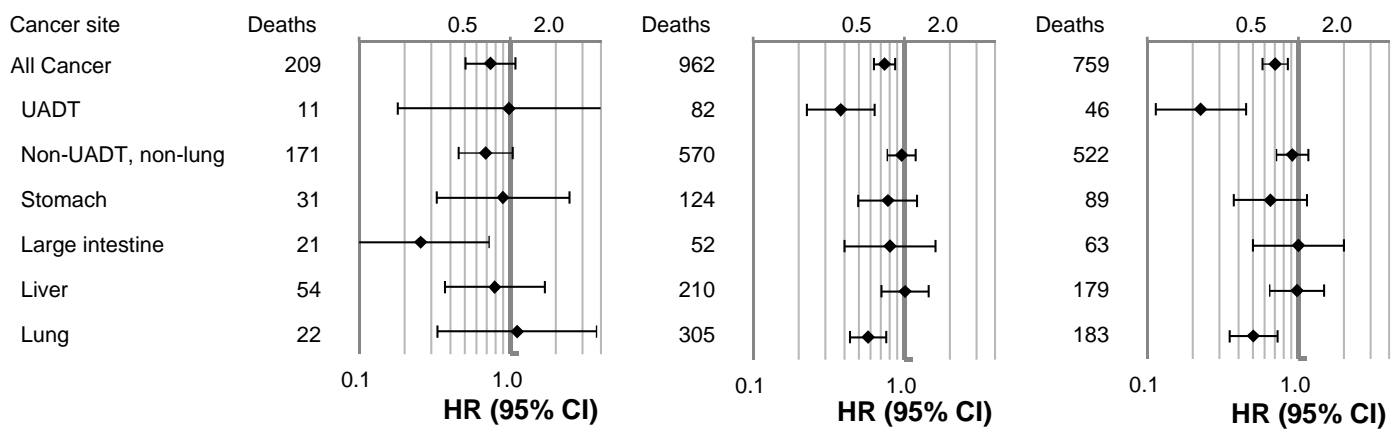

### 25-47 kg/m<sup>2</sup>

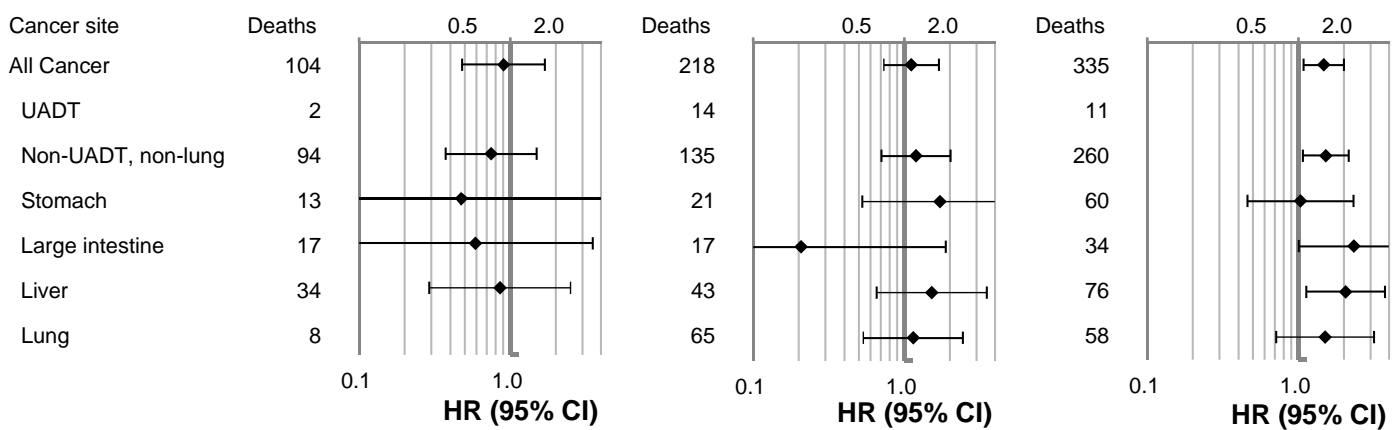

**eFigure 5. Hazard ratios for selected cancer mortality per 5 kg/m<sup>2</sup> higher BMI across BMI groups and smoking status in participants with no pre-existing cancers at baseline.** Analyses were adjusted for age, smoking, alcohol intake, household income, and physical activity. Cancers which had 10 or more cases in never-smokers among all participants in 12-24.9 or 25-47 kg/m<sup>2</sup> were included.

### 12-47 kg/m<sup>2</sup>

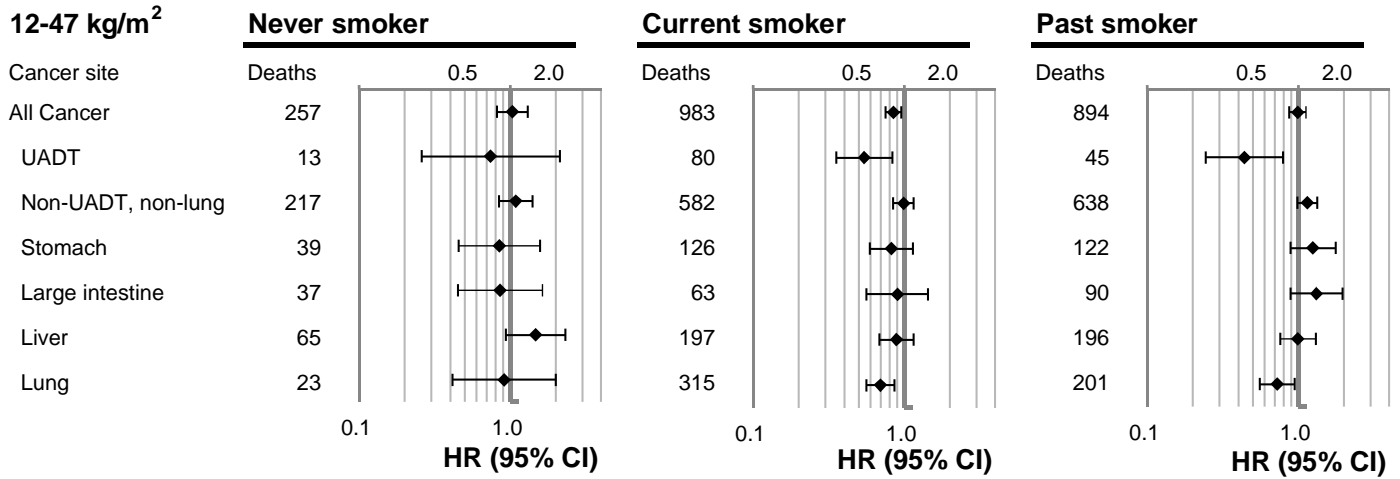

### 12-24.9 kg/m<sup>2</sup>

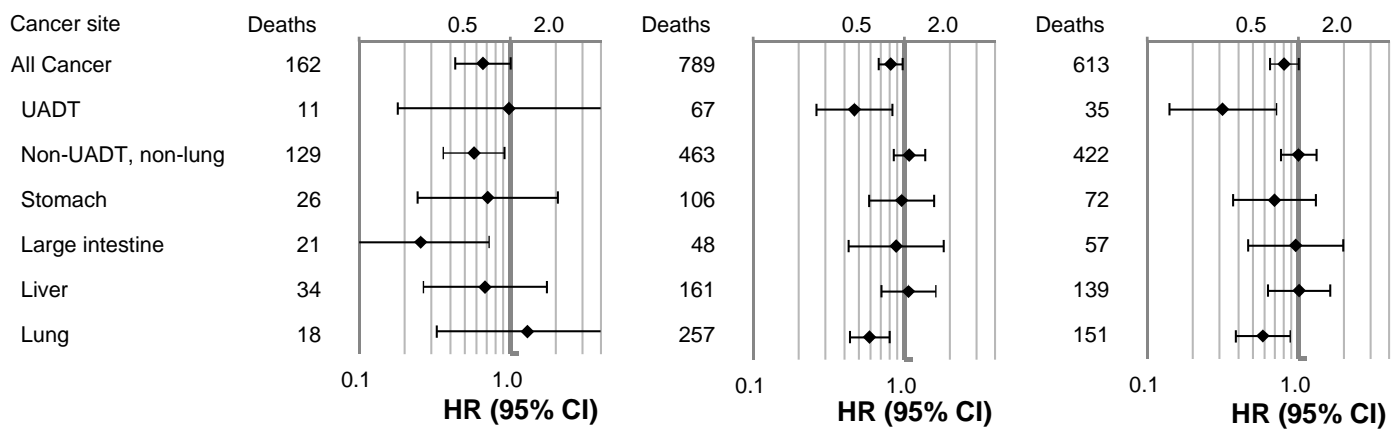

### 25-47 kg/m<sup>2</sup>

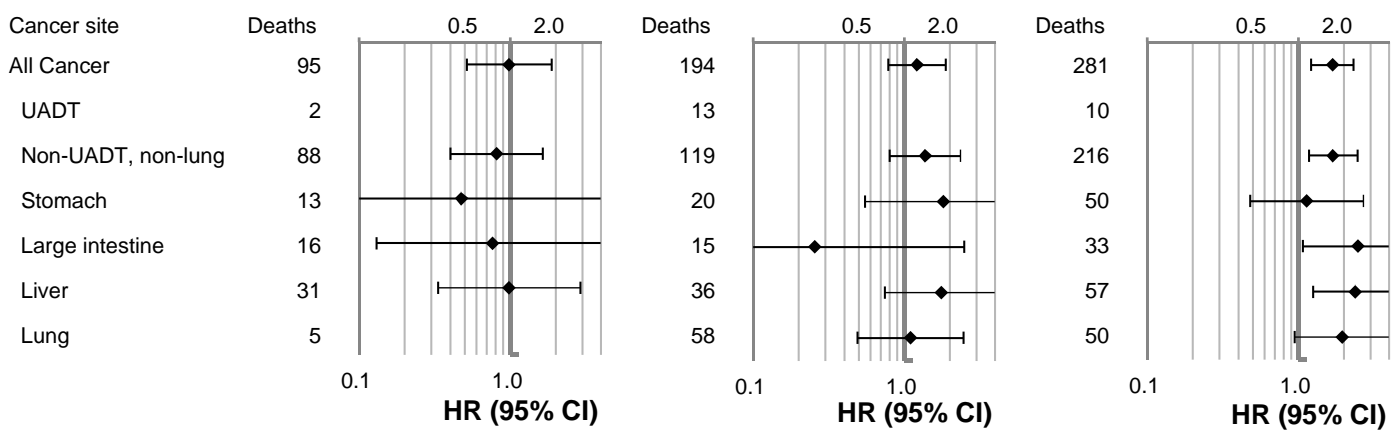

**eFigure 6. Hazard ratios for selected cancer mortality per 5 kg/m<sup>2</sup> higher BMI across BMI groups and smoking status after exclusion of the first two years of follow-up and pre-existing cancers at baseline.** Analyses were adjusted for age, smoking, alcohol intake, household income, and physical activity. Cancers which had 10 or more cases in never-smokers among all participants in 12-24.9 or 25-47 kg/m<sup>2</sup> were included.
